# Supplementary material for: Comparison of healthcare resource use and cost between influenza and COVID-19 vaccine coadministration and influenza vaccination only
Source: bioRxiv or medRxiv preprint supplement (doi:10.1101/2024.06.06.24308506), 2024-06-07
Supplement: Supplementary file [file media-1.pdf]

1 **Supplementary Table 1: Procedure and NDC codes used to identify COVID-19 and**  
 2 **influenza vaccinations**

| Vaccine           | Code Type | Code                                                                                                                                                                                                                                                                                                                                                                                                                                                                                                                                                                                                                                                                                                                                                                                                                                                                                                                                                                                                                                                                                                                                                                                                                                        |
|-------------------|-----------|---------------------------------------------------------------------------------------------------------------------------------------------------------------------------------------------------------------------------------------------------------------------------------------------------------------------------------------------------------------------------------------------------------------------------------------------------------------------------------------------------------------------------------------------------------------------------------------------------------------------------------------------------------------------------------------------------------------------------------------------------------------------------------------------------------------------------------------------------------------------------------------------------------------------------------------------------------------------------------------------------------------------------------------------------------------------------------------------------------------------------------------------------------------------------------------------------------------------------------------------|
| Influenza vaccine | HCPCS/CPT | 90630, 90653, 90654, 90655, 90656, 90657, 90658, 90660, 90661, 90662, 90664, 90666, 90667, 90668, 90672, 90673, 90674, 90682, 90685, 90686, 90687, 90688, 90689, 90694, 90756, G0008, Q2034, Q2035, Q2036, Q2037, Q2038, Q2039                                                                                                                                                                                                                                                                                                                                                                                                                                                                                                                                                                                                                                                                                                                                                                                                                                                                                                                                                                                                              |
|                   | NDC       | 19515080852, 19515081652, 19515081852, 19515084511, 19515088907, 19515089007, 19515089111, 19515089307, 19515089452, 19515089511, 19515089611, 19515089711, 19515089811, 19515090011, 19515090152, 19515090311, 19515090652, 19515090852, 19515090952, 19515091252, 33332001001, 33332001301, 33332001401, 33332001501, 33332001601, 33332001701, 33332001801, 33332011010, 33332011310, 33332011410, 33332011510, 33332011610, 33332011710, 33332011810, 33332021920, 33332022020, 33332022120, 33332031601, 33332031701, 33332031801, 33332031901, 33332032001, 33332032101, 33332032203, 33332041610, 33332041710, 33332041810, 33332041910, 33332042010, 33332042110, 33332042210, 42874001210, 42874001310, 42874001410, 42874001510, 42874001610, 42874001710, 42874011710, 49281001010, 49281001025, 49281001050, 49281001110, 49281001150, 49281001210, 49281001250, 49281001310, 49281001350, 49281001450, 49281011125, 49281011225, 49281011325, 49281012065, 49281012165, 49281012265, 49281032050, 49281032150, 49281033615, 49281033715, 49281038615, 49281038765, 49281038815, 49281038965, 49281039015, 49281039165, 49281039215, 49281039365, 49281039415, 49281039565, 49281039615, 49281039765, 49281039965, 49281040165, |

49281040365, 49281040565, 49281041310, 49281041350,  
49281041410, 49281041450, 49281041510, 49281041610,  
49281041650, 49281041710, 49281041750, 49281041810,  
49281041850, 49281041910, 49281041950, 49281042010,  
49281042050, 49281042110, 49281042150, 49281042210,  
49281042250, 49281051325, 49281051425, 49281051625,  
49281051725, 49281051825, 49281051925, 49281052025,  
49281052125, 49281062115, 49281062515, 49281062715,  
49281062915, 49281063115, 49281063315, 49281063515,  
49281063715, 49281070355, 49281070555, 49281070755,  
49281070840, 49281070955, 49281071040, 49281071240,  
49281071810, 49281071910, 49281072010, 49281072110,  
49281072210, 54868617700, 54868618000, 58160087952,  
58160088052, 58160088152, 58160088352, 58160088552,  
58160088752, 58160089052, 58160089652, 58160089852,  
58160090052, 58160090152, 58160090352, 58160090552,  
58160090752, 62577061301, 62577061401, 63851061201,  
66019010701, 66019010810, 66019010910, 66019011010,  
66019030010, 66019030110, 66019030210, 66019030310,  
66019030410, 66019030510, 66019030610, 66019030710,  
66019030810, 66019030910, 66521000001, 66521011202,  
66521011210, 66521011302, 66521011310, 66521011402,  
66521011410, 66521011502, 66521011510, 66521011602,  
66521011610, 66521011702, 66521011710, 66521011802,  
66521011810, 70461000101, 70461000201, 70461001803,  
70461001903, 70461002003, 70461011902, 70461011910,  
70461012002, 70461012003, 70461012010, 70461012103,  
70461012203, 70461020001, 70461020101, 70461030110,  
70461031803, 70461031903, 70461032003, 70461032103,  
70461032203, 70461041810, 70461041910, 70461042010,

|                    |           |                                                                                                                                                                                                                                                                                                                                                                                                                                                                                                                 |
|--------------------|-----------|-----------------------------------------------------------------------------------------------------------------------------------------------------------------------------------------------------------------------------------------------------------------------------------------------------------------------------------------------------------------------------------------------------------------------------------------------------------------------------------------------------------------|
|                    |           | 70461042110, 70461042210, 76420048201, 76420048301, 49281018125                                                                                                                                                                                                                                                                                                                                                                                                                                                 |
| COVID-19 - vaccine | HCPCS/CPT | 0021A, 0022A, 91302, 0031A, 0034A, 91303, 0011A, 0012A, 0013A, 0064A, 0091A, 0092A, 0093A, 0094A, 0111A, 0112A, 0113A, 0134A, 0141A, 0142A, 0144A, 0164A, 91301, 91306, 91309, 91311, 91313, 91314, 91316, 91321, 91322, 0041A, 0042A, 0044A, 91304, 90480, 0001A, 0002A, 0003A, 0004A, 0051A, 0052A, 0053A, 0054A, 0071A, 0072A, 0073A, 0074A, 0081A, 0082A, 0083A, 0121A, 0124A, 0151A, 0154A, 0171A, 0172A, 0173A, 0174A, 91300, 91305, 91307, 91308, 91312, 91315, 91317, 91318, 91319, 91320, 0104A, 91310 |
|                    | NDC       | 00310122210, 00310122215, 0310122210, 0310122215, 59676058005, 59676058015, 5967658005, 5967658015,                                                                                                                                                                                                                                                                                                                                                                                                             |

80777010011, 80777010099, 80777010201, 80777010204,  
80777010293, 80777010295, 80777010296, 80777027310,  
80777027315, 80777027398, 80777027399, 80777027505,  
80777027599, 80777027705, 80777027799, 80777027905,  
80777027999, 80777028005, 80777028099, 80777028205,  
80777028299, 80777028302, 80777028399, 80777028707,  
80777028792, 8077701001, 8077710011, 8077710099,  
8077710201, 8077710204, 8077710293, 8077710295,  
8077710296, 8077727310, 8077727315, 8077727398,  
8077727399, 8077727505, 8077727599, 8077727705,  
8077727799, 8077727905, 8077727999, 8077728205,  
8077728299, 8077728302, 8077728399, 8077728707,  
8077728792, 80631010001, 80631010010, 80631010501,  
80631010502, 80631100001, 8063110001, 8063110010,  
8063110201, 8063110210, 8063110501, 8063110502,  
80631010201, 80631010210, 00069202501, 00069202510,  
00069202525, 00069236201, 00069236210, 00069239201,  
00069239210, 59267007801, 59267007804, 59267030401,  
59267030402, 59267056501, 59267056502, 59267060901,  
59267060902, 59267100001, 59267100002, 59267100003,  
59267102501, 59267102502, 59267102503, 59267102504,  
59267105501, 59267105502, 59267105504, 59267140401,  
59267140402, 59267431502, 59267433101, 59267433102,  
0006920251, 5926700781, 5926700784, 5926703041,  
5926703042, 5926705651, 5926705652, 5926706091,  
5926706092, 5926710001, 5926710002, 5926710003,  
5926710251, 5926710252, 5926710253, 5926710254,  
5926710551, 5926710552, 5926710554, 5926714041,  
5926714042, 5926743151, 5926743152, 5926743311,  
5926743312, 49281061878, 49281061820, 4928161820,  
4928161878

3 **Supplementary Table 2: International Classification of Diseases, 10th Revision (ICD-10)**  
4 **diagnostic codes used to identify pneumonia, influenza, COVID-19 and**  
5 **cardiorespiratory conditions**

| Condition         | Code                                                                                                                                                                                                                                                                                                                                                                                                                                                                                                                                                                          |
|-------------------|-------------------------------------------------------------------------------------------------------------------------------------------------------------------------------------------------------------------------------------------------------------------------------------------------------------------------------------------------------------------------------------------------------------------------------------------------------------------------------------------------------------------------------------------------------------------------------|
| Pneumonia         | J12, J12.0, J12.09, J12.1, J12.10, J12.2, J12.3, J12.59, J12.8, J12.81, J12.82, J12.84, J12.89, J12.9, J12.9X, J13, J13.0, J13.09, J13.2, J13.35, J13.9, J14, J14.3, J14.8, J14.9, J15, J15.0, J15.02XA, J15.1, J15.2, J15.20, J15.21, J15.211, J15.212, J15.29, J15.3, J15.4, J15.5, J15.6, J15.61, J15.69, J15.7, J15.8, J15.82, J15.9, J16, J16.0, J16.8, J16.80, J16.9, J17, J17.0, J17.210, J17.8, J18, J18.0, J18.00, J18.1, J18.10, J18.18, J18.2, J18.20, J18.3, J18.6, J18.7, J18.8, J18.80, J18.85, J18.89, J18.9, J18.90, J18.9000, J18.91, J18.96, J18.97, J18.9D |
| Influenza         | J09, J09.0, J09.02, J09.10, J09.2, J09.2X, J09.6, J09.7X, J09.81, J09.82, J09.9, J09.90, J09.X, J09.X1, J09.X2, J09.X3, J09.X9, J09.XA, J09.XI, J10, J10.0, J10.00, J10.01, J10.08, J10.1, J10.10, J10.110, J10.12, J10.17, J10.19, J10.190, J10.2, J10.3, J10.4, J10.40, J10.45, J10.8, J10.80, J10.81, J10.82, J10.83, J10.89, J10.9, J10.90, J11, J11.0, J11.00, J11.08, J11.1, J11.10, J11.103, J11.11, J11.2, J11.20, J11.23, J11.5, J11.8, J11.81, J11.82, J11.83, J11.89, J11.9                                                                                        |
| COVID-19          | U07.1                                                                                                                                                                                                                                                                                                                                                                                                                                                                                                                                                                         |
| Cardiorespiratory | I**, J**                                                                                                                                                                                                                                                                                                                                                                                                                                                                                                                                                                      |

6

7

8 Supplemental Table 3

|                                      | <b>Co-admin<br/>N = 613,156</b> | <b>Influenza<br/>N =1,340,011</b> | <b>ASD (Prior<br/>to<br/>Weighting)</b> | <b>ASD (Post-<br/>Weighting)</b> |
|--------------------------------------|---------------------------------|-----------------------------------|-----------------------------------------|----------------------------------|
| <b>Age on Index Date</b>             |                                 |                                   |                                         |                                  |
| mean (SD)                            | 70.97 (9.18)                    | 71.87 (9.42)                      | 0.097                                   | 0.009                            |
| median (IQR)                         | 71.00 (66.00,77.00)             | 72.00 (67.00,79.00)               |                                         |                                  |
| <b>Age Group, n(%)</b>               |                                 |                                   |                                         |                                  |
| 50-64                                | 132,848 (21.67%)                | 268,217 (20.02%)                  | 0.041                                   | 0.023                            |
| 65+                                  | 480,308 (78.33%)                | 1,071,794 (79.98%)                | 0.041                                   | 0.023                            |
| <b>Gender, n(%)</b>                  |                                 |                                   |                                         |                                  |
| Female                               | 327,738 (53.45%)                | 775,100 (57.84%)                  | 0.088                                   | 0.003                            |
| Male                                 | 285,418 (46.55%)                | 564,911 (42.16%)                  | 0.088                                   | 0.003                            |
| <b>Race, n(%)</b>                    |                                 |                                   |                                         |                                  |
| White                                | 476,306 (77.68%)                | 948,828 (70.81%)                  | 0.158                                   | 0.021                            |
| Asian                                | 20,011 (3.26%)                  | 45,918 (3.43%)                    | 0.009                                   | 0.008                            |
| Black                                | 44,449 (7.25%)                  | 133,074 (9.93%)                   | 0.096                                   | 0.005                            |
| Hispanic                             | 39,092 (6.38%)                  | 126,389 (9.43%)                   | 0.113                                   | 0.02                             |
| Missing/unknown                      | 33,298 (5.43%)                  | 85,802 (6.40%)                    | 0.041                                   | 0.003                            |
| <b>Insurance, n(%)</b>               |                                 |                                   |                                         |                                  |
| Commercial                           | 125,618 (20.49%)                | 222,061 (16.57%)                  | 0.101                                   | 0.014                            |
| Medicare<br>Advantage                | 487,538 (79.51%)                | 1,117,950 (83.43%)                | 0.101                                   | 0.014                            |
| <b>Region, n(%)</b>                  |                                 |                                   |                                         |                                  |
| Northeast                            | 76,274 (12.44%)                 | 169,717 (12.67%)                  | 0.007                                   | 0.002                            |
| Midwest                              | 169,838 (27.70%)                | 279,674 (20.87%)                  | 0.16                                    | 0.001                            |
| South                                | 197,075 (32.14%)                | 636,165 (47.47%)                  | 0.317                                   | 0.001                            |
| West                                 | 169,969 (27.72%)                | 254,455 (18.99%)                  | 0.207                                   | 0.002                            |
| <b>Charlson-Quan score,<br/>n(%)</b> |                                 |                                   |                                         |                                  |

|                                 |                  |                  |       |       |
|---------------------------------|------------------|------------------|-------|-------|
| 0                               | 448,619 (73.17%) | 898,530 (67.05%) | 0.134 | 0.015 |
| 1                               | 113,722 (18.55%) | 289,525 (21.61%) | 0.076 | 0.017 |
| >=2                             | 50,815 (8.29%)   | 151,956 (11.34%) | 0.103 | 0.001 |
| <b>Charlson-Quan score</b>      |                  |                  |       |       |
| mean (SD)                       | 0.40 (0.86)      | 0.51 (0.94)      | 0.121 | 0.004 |
| median (IQR)                    | 0.00 (0.00,1.00) | 0.00 (0.00,1.00) |       |       |
| <b>Comorbidities, n(%)</b>      |                  |                  |       |       |
| Alcohol Abuse                   | 1,107 (0.18%)    | 2,203 (0.16%)    | 0.004 | 0.007 |
| Anemia                          | 87,415 (14.26%)  | 245,452 (18.32%) | 0.11  | 0.003 |
| Asthma                          | 42,702 (6.96%)   | 101,029 (7.54%)  | 0.022 | 0.001 |
| Cerebrovascular Disease         | 51,833 (8.45%)   | 146,653 (10.94%) | 0.084 | 0.011 |
| Chronic Pulmonary Disease       | 100,103 (16.33%) | 262,332 (19.58%) | 0.085 | 0.025 |
| Chronic kidney disease          | 101,050 (16.48%) | 271,729 (20.28%) | 0.098 | 0.002 |
| Coagulopathy                    | 35,311 (5.76%)   | 92,148 (6.88%)   | 0.046 | 0.018 |
| Congestive Heart Failure        | 51,529 (8.40%)   | 148,251 (11.06%) | 0.09  | 0.006 |
| COPD                            | 65,744 (10.72%)  | 187,197 (13.97%) | 0.099 | 0.033 |
| Cystic Fibrosis                 | 58 (0.01%)       | 126 (0.01%)      | 0     | 0.002 |
| Dementia                        | 18,029 (2.94%)   | 55,039 (4.11%)   | 0.063 | 0.002 |
| Depression                      | 95,994 (15.66%)  | 215,175 (16.06%) | 0.011 | 0.037 |
| Dysautonomia                    | 445 (0.07%)      | 958 (0.07%)      | 0     | 0.007 |
| Fluid and Electrolyte Disorders | 52,674 (8.59%)   | 152,025 (11.35%) | 0.092 | 0.008 |
| Hypertension                    | 385,012 (62.79%) | 945,512 (70.56%) | 0.165 | 0.003 |
| Hyperthyroidism                 | 5,708 (0.93%)    | 15,114 (1.13%)   | 0.02  | 0.006 |
| Liver Disease                   | 34,418 (5.61%)   | 88,710 (6.62%)   | 0.042 | 0.003 |

|                                           |                  |                  |       |       |
|-------------------------------------------|------------------|------------------|-------|-------|
| Myocardial Infarction                     | 20,532 (3.35%)   | 57,984 (4.33%)   | 0.051 | 0.007 |
| Obesity                                   | 121,794 (19.86%) | 276,265 (20.62%) | 0.019 | 0.003 |
| Neurological Disorders                    | 35,810 (5.84%)   | 91,981 (6.86%)   | 0.042 | 0.008 |
| Influenza infection                       | 2,887 (0.47%)    | 10,386 (0.78%)   | 0.039 | 0.003 |
| RSV infection                             | 409 (0.07%)      | 1,226 (0.09%)    | 0.009 | 0     |
| Paralysis                                 | 4,092 (0.67%)    | 12,196 (0.91%)   | 0.027 | 0.002 |
| Peptic Ulcer Disease                      | 5,713 (0.93%)    | 14,973 (1.12%)   | 0.018 | 0.008 |
| Peripheral Vascular Disease               | 91,914 (14.99%)  | 254,247 (18.97%) | 0.106 | 0.026 |
| Postural orthostatic tachycardia syndrome | 6,036 (0.98%)    | 15,324 (1.14%)   | 0.016 | 0.002 |
| Psychoses                                 | 3,441 (0.56%)    | 10,467 (0.78%)   | 0.027 | 0.009 |
| Pulmonary circulation disorder            | 19,272 (3.14%)   | 51,712 (3.86%)   | 0.039 | 0.004 |
| Pulmonary fibrosis                        | 6,723 (1.10%)    | 18,891 (1.41%)   | 0.028 | 0.008 |
| Renal Failure                             | 94,863 (15.47%)  | 254,569 (19.00%) | 0.093 | 0     |
| Rheumatoid Arthritis                      | 15,594 (2.54%)   | 42,753 (3.19%)   | 0.039 | 0.003 |
| Sickle cell disease                       | 321 (0.05%)      | 1,000 (0.07%)    | 0.009 | 0.002 |
| Smoking                                   | 107,972 (17.61%) | 255,674 (19.08%) | 0.038 | 0.003 |
| Type 1 Diabetes                           | 6,601 (1.08%)    | 17,634 (1.32%)   | 0.022 | 0.002 |
| Type 2 Diabetes                           | 156,829 (25.58%) | 425,649 (31.76%) | 0.137 | 0.041 |
| Valvular Disease                          | 62,783 (10.24%)  | 165,680 (12.36%) | 0.067 | 0.008 |
| COVID-19 Infection                        | 54,125 (8.83%)   | 169,947 (12.68%) | 0.125 | 0.004 |

|                                                          |                  |                  |       |       |
|----------------------------------------------------------|------------------|------------------|-------|-------|
| Post COVID-19 Condition                                  | 2,882 (0.47%)    | 10,078 (0.75%)   | 0.036 | 0.01  |
| Pneumonia                                                | 15,499 (2.53%)   | 53,782 (4.01%)   | 0.084 | 0.004 |
| <b>Receipt of COVID-19 vaccine in prior year, n(%)</b>   | 366,183 (59.72%) | 373,455 (27.87%) | 0.678 | 0.007 |
| <b>Receipt of influenza vaccine in prior year, n (%)</b> | 259,654 (42.35%) | 495,290 (36.96%) | 0.11  | 0.012 |
| <b>Other Vaccine Utilization, n(%)</b>                   | 126,327 (20.60%) | 222,027 (16.57%) | 0.104 | 0.004 |
| Haemophilus influenzae type b Vaccine                    | 118 (0.02%)      | 229 (0.02%)      | 0.002 | 0.001 |
| Hepatitis A Vaccine                                      | 854 (0.14%)      | 1,065 (0.08%)    | 0.018 | 0.007 |
| Hepatitis B Vaccine                                      | 3,002 (0.49%)    | 7,065 (0.53%)    | 0.005 | 0.013 |
| Human papillomavirus (HPV) Vaccine                       | 58 (0.01%)       | 69 (0.01%)       | 0.005 | 0.002 |
| Measles, mumps, rubella (MMR) - Vaccine                  | 298 (0.05%)      | 417 (0.03%)      | 0.009 | 0.001 |
| Meningococcal Vaccine                                    | 482 (0.08%)      | 515 (0.04%)      | 0.017 | 0.011 |
| Pneumococcal Vaccine                                     | 43,883 (7.16%)   | 84,364 (6.30%)   | 0.034 | 0.01  |

|                                               |                  |                  |       |       |
|-----------------------------------------------|------------------|------------------|-------|-------|
| Tetanus, diphtheria, pertussis (TDaP) Vaccine | 35,040 (5.71%)   | 60,330 (4.50%)   | 0.055 | 0.003 |
| Varicella Vaccine                             | 47 (0.01%)       | 62 (0.00%)       | 0.004 | 0.001 |
| Zoster Vaccine                                | 62,434 (10.18%)  | 98,163 (7.33%)   | 0.101 | 0.011 |
| <b>Any Cancer screening procedure, n(%)</b>   | 235,000 (38.33%) | 488,070 (36.42%) | 0.039 | 0.006 |
| Breast cancer screening procedure             | 143,920 (23.47%) | 306,794 (22.89%) | 0.014 | 0.002 |
| Cervical cancer screening procedure           | 10,400 (1.70%)   | 21,681 (1.62%)   | 0.006 | 0.007 |
| Colorectal cancer screening procedure         | 68,844 (11.23%)  | 139,847 (10.44%) | 0.025 | 0.002 |
| Prostate cancer screening procedure           | 48,178 (7.86%)   | 93,589 (6.98%)   | 0.033 | 0.005 |
| <b>Immunocompromised status, n (%)</b>        | 80,046 (13.05%)  | 185,017 (13.81%) | 0.022 | 0.002 |
| Stem Cell Transplant during baseline          | 5 (0.00%)        | 39 (0.00%)       | 0.005 | 0.004 |
| Blood Transplant within 730 days              | 11,925 (1.94%)   | 34,047 (2.54%)   | 0.04  | 0.013 |
| Malignancy within 180 days                    | 51,870 (8.46%)   | 117,724 (8.79%)  | 0.012 | 0.002 |
| Ever HIV                                      | 2,722 (0.44%)    | 4,273 (0.32%)    | 0.02  | 0.033 |
| Immunosuppressive Therapy within 60 days      | 18,444 (3.01%)   | 40,140 (3.00%)   | 0.001 | 0.009 |
| Ever Primary Immunodeficiency                 | 3,397 (0.55%)    | 8,317 (0.62%)    | 0.009 | 0.005 |

|                                                                   |                                  |                                  |       |       |
|-------------------------------------------------------------------|----------------------------------|----------------------------------|-------|-------|
| Organ Transplant and Immunosuppressive Therapy within 60 days     | 3,967 (0.65%)                    | 8,779 (0.66%)                    | 0.001 | 0.01  |
| <b>Hospitalizations during baseline, n (%)</b>                    | 47,609 (7.76%)                   | 139,409 (10.40%)                 | 0.092 | 0.005 |
| <b>Number of all-cause outpatient or ER encounter at baseline</b> |                                  |                                  |       |       |
| mean (SD)                                                         | 17.92 (18.75)                    | 20.60 (23.46)                    | 0.126 | 0.001 |
| median (IQR)                                                      | 12.00 (6.00,23.00)               | 14.00 (7.00,26.00)               |       |       |
| <b>Baseline all-cause medical cost (\$) #</b>                     |                                  |                                  |       |       |
| mean (SD)                                                         | 13,945.37<br>(31,878.80)         | 16,583.35 (40,920.78)            | 0.072 | 0.017 |
| median (IQR)                                                      | 4,403.94<br>(1,597.90,12,015.46) | 5,130.68<br>(1,877.38,14,050.31) |       |       |
| <b>Index Year and Month, n(%)</b>                                 |                                  |                                  |       |       |
| 2022 AUG-SEP                                                      | 165,517 (26.99%)                 | 277,656 (20.72%)                 | 0.148 | 0.015 |
| 2022 OCT                                                          | 286,133 (46.67%)                 | 579,235 (43.23%)                 | 0.069 | 0.008 |
| 2022 NOV                                                          | 105,510 (17.21%)                 | 303,245 (22.63%)                 | 0.136 | 0.009 |
| 2022 DEC                                                          | 43,530 (7.10%)                   | 133,756 (9.98%)                  | 0.103 | 0.016 |
| 2023 JAN                                                          | 12,466 (2.03%)                   | 46,119 (3.44%)                   | 0.086 | 0.008 |
